# Supplementary material
Source: PubMed Central journal article supplement (PMC2689779)
Supplement: M800193-MCP200_1.pdf [file M800193-MCP200_1.pdf]

**Supplementary Data n°2: Summary of the other putative Proteasome Interacting Proteins (PIPs) identified (not listed in Tables I and II)**

| Name                                                        | #<br>Accession | References | Name                                                                         | #<br>Accession | References |
|-------------------------------------------------------------|----------------|------------|------------------------------------------------------------------------------|----------------|------------|
| <b>Nucleotide Excision Repair Pathway</b>                   |                |            | <b>Other proteins</b>                                                        |                |            |
| Histone H2B type 1-B <sup>a,c,d</sup>                       | P33778         | (1)        | Nascent polypeptide-associated complex subunit alpha <sup>b,c</sup>          | Q13765         | /          |
| Histone H4 <sup>b,d</sup>                                   | P62805         |            | 14-3-3 protein epsilon1 <sup>d</sup>                                         | P62258         | (1)        |
| Purine nucleoside phosphorylase                             | P00491         | /          | Programmed cell death protein 6 <sup>a</sup>                                 | O75340         | /          |
| <b>Acto-myosin Cytoskeleton Signaling</b>                   |                |            | Activated RNA polymerase II transcription cofactor 4 variant <sup>a,c</sup>  | Q59G24         | /          |
| Actin, cytoplasmic 1 <sup>b,e</sup>                         | P60709         | (2)        | ADP-ribosylation factor 1 <sup>c</sup>                                       | P84077         | /          |
| Actin, alpha cardiac muscle 1 <sup>b,e</sup>                | P68032         |            | ATP synthase subunit alpha, mitochondrial precursor <sup>b,c</sup>           | P25705         | /          |
| Myosin, heavy chain 6, cardiac muscle, alpha <sup>a,e</sup> | P13533         |            | ATP synthase subunit beta, mitochondrial precursor <sup>b,c</sup>            | P06576         | /          |
| Myosin, heavy chain 7, cardiac muscle, beta <sup>e</sup>    | A2TDB6         |            | Lysozyme C precursor <sup>a</sup>                                            | P61626         | /          |
|                                                             |                |            | Protein UNQ773/PRO1567 precursor <sup>b,c</sup>                              | Q96DA0         | /          |
|                                                             |                |            | Deleted in malignant brain tumors 1 <sup>b,c</sup>                           | Q5JR23         | /          |
|                                                             |                |            | 40S ribosomal protein S14 <sup>b,c</sup>                                     | P62263         | /          |
|                                                             |                |            | Importin 9 <sup>a</sup>                                                      | Q96P70         | /          |
|                                                             |                |            | UPF0424 protein C1orf128                                                     | Q9GZP4         | /          |
|                                                             |                |            | Serpin B6 <sup>a,c</sup>                                                     | P35237         | /          |
|                                                             |                |            | Acidic leucine-rich nuclear phosphoprotein 32 family member A <sup>b,c</sup> | P39687         | /          |

Proteins listed in the table were purified as described in the experimental section, separated by SDS-PAGE and identified by nanoLC-ESI-LTQ-Orbitrap, MS/MS analysis and database searching. Non specific interactions could be eliminated by performing a differential analysis with proteins purified with the OX8 antibody and similarly identified.

Criteria for acceptance of proteins identification are described in the experimental part.

<sup>a</sup> : identified only in the non-treated sample

<sup>b</sup> : identified only in the formaldehyde-treated sample

<sup>c</sup> : proteins identified in one experiment only

<sup>d</sup> : reported human PIPs (identical protein or protein from the same family)

<sup>e</sup> : reported PIPs only in other species

#### **References :**

- 1. Wang, X. and Huang, L. (2008) Identifying dynamic interactors of protein complexes by quantitative mass spectrometry. *Mol Cell Proteomics* 7, 46-57**
- 2. Horiguchi, R., Dohra, H. and Tokumoto, T. (2006) Comparative proteome analysis of changes in the 26S proteasome during oocyte maturation in goldfish. *Proteomics* 6, 4195-202**
