# Supplementary material
Source: PubMed Central journal article supplement (PMC2689779)
Supplement: M800193-MCP200_2.pdf [file M800193-MCP200_2.pdf]

Proteasome Interacting Proteins identified with a unique peptide (p-value < 0,001)

| Hit                 | Accession - ID                      | Description                                      | Score     | MW         | PI      | Coverage   | Peptides | Peptides R&G | Valid protein |             |          |
|---------------------|-------------------------------------|--------------------------------------------------|-----------|------------|---------|------------|----------|--------------|---------------|-------------|----------|
| <a href="#">34</a>  | <a href="#">P62263 - RS14_HUMAN</a> | 40S ribosomal protein S14 - Homo sapiens (Human) | 71.95     | 16262.53   | 10.07   | 7          | 1        |              |               |             |          |
| Query               | m/z                                 | Charge                                           | Exp. mass | Theo. mass | Delta   | Miss. clv. | Score    | pValue       | Rank          | Sequence    | Position |
| <a href="#">888</a> | 527.79                              | 2                                                | 1053.56   | 1053.56    | 0.00015 | 0          | 49       | 0.000545     | 1             | TPGPGAQSALR | 107-117  |

| Hit                  | Accession - ID                      | Description                               | Score       | MW          | PI       | Coverage   | Peptides | Peptides R&G          | Valid protein |                                                             |          |
|----------------------|-------------------------------------|-------------------------------------------|-------------|-------------|----------|------------|----------|-----------------------|---------------|-------------------------------------------------------------|----------|
| <a href="#">37</a>   | <a href="#">P62877 - RBX1_HUMAN</a> | RING-box protein 1 - Homo sapiens (Human) | 101.33      | 12265.74    |          |            | 3        |                       |               |                                                             |          |
| Query                | m/z                                 | Charge                                    | Exp. mass   | Theo. mass  | Delta    | Miss. clv. | Score    | pValue                | Rank          | Sequence                                                    | Position |
| <a href="#">2215</a> | 854.3806                            | 2                                         | 1706.746648 | 1706.741745 | 0.004903 | 0          | 72       | 3.53244007153291e-006 | 1             | AAAMDVDTPSGTNSGAGK + Acetyl (Protein N-term); Oxidation (M) | 2-19     |

| Hit                  | Accession - ID                        | Description                                                                         | Score       | MW         | PI       | Coverage   | Peptides | Peptides R&G          | Valid protein |             |          |
|----------------------|---------------------------------------|-------------------------------------------------------------------------------------|-------------|------------|----------|------------|----------|-----------------------|---------------|-------------|----------|
| <a href="#">43</a>   | <a href="#">Q59G24 - Q59G24_HUMAN</a> | Activated RNA polymerase II transcription cofactor 4 variant - Homo sapiens (Human) | 63.00       | 15125.79   |          |            | 3        |                       |               |             |          |
| Query                | m/z                                   | Charge                                                                              | Exp. mass   | Theo. mass | Delta    | Miss. clv. | Score    | pValue                | Rank          | Sequence    | Position |
| <a href="#">1714</a> | 630.8082                              | 2                                                                                   | 1259.601848 | 1259.59935 | 0.002498 | 0          | 63       | 2.65879827439268e-005 | 1             | EQISDIDDAVR | 122-132  |

| Hit | Accession - ID | Description | Score | MW | PI | Coverage | Peptides | Bold&Red Peptides | Valid protein |
|-----|----------------|-------------|-------|----|----|----------|----------|-------------------|---------------|
|-----|----------------|-------------|-------|----|----|----------|----------|-------------------|---------------|

| <a href="#">48</a>   | <a href="#">Q13765 - NACA_HUMAN</a> | Nascent polypeptide-associated complex subunit alpha - Homo sapiens (Human) | 81.70       | 23369.71    |          | 6          | 1     | 1                                     |      |                                 |                         |
|----------------------|-------------------------------------|-----------------------------------------------------------------------------|-------------|-------------|----------|------------|-------|---------------------------------------|------|---------------------------------|-------------------------|
| Query                | m/z                                 | Charge                                                                      | Exp. mass   | Theo. mass  | Delta    | Miss. clv. | Score | pValue                                | Rank | Sequence                        | Position                |
| <a href="#">2249</a> | 807.9207                            | 2                                                                           | 1613.826848 | 1613.826019 | 0.000829 | 0          | 81    | <a href="#">7.72424799385339e-007</a> | 1    | <a href="#">IEDLSQQAQLAAAEK</a> | <a href="#">128-142</a> |

# Mascot Search Results

## Peptide View

MS/MS Fragmentation of **TPGPGAQSALR**

Found in **RS14\_HUMAN**, P62263|RS14\_HUMAN 40S ribosomal protein S14 - Homo sapiens (Human)

Match to Query 888: 1053.556848 from(527.785700,2+)

Title: OTMPB070622\_20.712.712.2.dta

Data file D:\data\_LTQOrbitrap\Marie-Pierre Bousquet\OTMPB070622\_20.RAW

Click mouse within plot area to zoom in by factor of two about that point

Or,  to  Da

**Monoisotopic mass of neutral peptide Mr(calc):** 1053.5567

**Ions Score:** 49 **Expect:** 0.00054

**Matches (Bold Red):** 17/102 fragment ions using 34 most intense peaks

| # | b | b <sup>++</sup> | b <sup>*</sup> | b <sup>+++</sup> | b <sup>0</sup> | b <sup>0++</sup> | Seq. | y | y <sup>++</sup> | y <sup>*</sup> | y <sup>+++</sup> | y <sup>0</sup> | y <sup>0++</sup> | # |
|---|---|-----------------|----------------|------------------|----------------|------------------|------|---|-----------------|----------------|------------------|----------------|------------------|---|
|---|---|-----------------|----------------|------------------|----------------|------------------|------|---|-----------------|----------------|------------------|----------------|------------------|---|

|    |                 |          |          |          |                 |          |   |                 |                 |                 |          |                 |          |  |    |
|----|-----------------|----------|----------|----------|-----------------|----------|---|-----------------|-----------------|-----------------|----------|-----------------|----------|--|----|
| 1  | 102.0550        | 51.5311  |          |          | 84.0444         | 42.5258  | T |                 |                 |                 |          |                 |          |  | 11 |
| 2  | <b>199.1077</b> | 100.0575 |          |          | 181.0972        | 91.0522  | P | 953.5163        | <b>477.2618</b> | 936.4898        | 468.7485 | 935.5057        | 468.2565 |  | 10 |
| 3  | 256.1292        | 128.5682 |          |          | <b>238.1186</b> | 119.5629 | G | <b>856.4635</b> | <b>428.7354</b> | 839.4370        | 420.2221 | 838.4530        | 419.7301 |  | 9  |
| 4  | 353.1819        | 177.0946 |          |          | 335.1714        | 168.0893 | P | <b>799.4421</b> | <b>400.2247</b> | 782.4155        | 391.7114 | 781.4315        | 391.2194 |  | 8  |
| 5  | 410.2034        | 205.6053 |          |          | 392.1928        | 196.6001 | G | <b>702.3893</b> | 351.6983        | 685.3628        | 343.1850 | 684.3787        | 342.6930 |  | 7  |
| 6  | 481.2405        | 241.1239 |          |          | 463.2300        | 232.1186 | A | <b>645.3679</b> | 323.1876        | 628.3413        | 314.6743 | 627.3573        | 314.1823 |  | 6  |
| 7  | 609.2991        | 305.1532 | 592.2726 | 296.6399 | 591.2885        | 296.1479 | Q | <b>574.3307</b> | <b>287.6690</b> | 557.3042        | 279.1557 | 556.3202        | 278.6637 |  | 5  |
| 8  | 696.3311        | 348.6692 | 679.3046 | 340.1559 | 678.3206        | 339.6639 | S | <b>446.2722</b> | 223.6397        | <b>429.2456</b> | 215.1264 | <b>428.2616</b> | 214.6344 |  | 4  |
| 9  | 767.3682        | 384.1878 | 750.3417 | 375.6745 | 749.3577        | 375.1825 | A | <b>359.2401</b> | 180.1237        | 342.2136        | 171.6104 |                 |          |  | 3  |
| 10 | 880.4523        | 440.7298 | 863.4258 | 432.2165 | 862.4417        | 431.7245 | L | <b>288.2030</b> | 144.6051        | 271.1765        | 136.0919 |                 |          |  | 2  |
| 11 |                 |          |          |          |                 |          | R | <b>175.1190</b> | 88.0631         | 158.0924        | 79.5498  |                 |          |  | 1  |

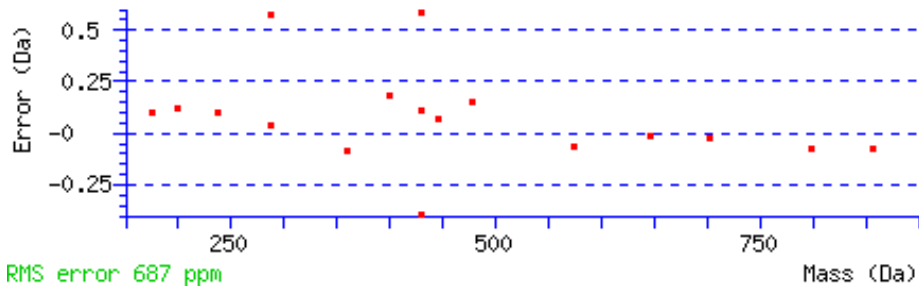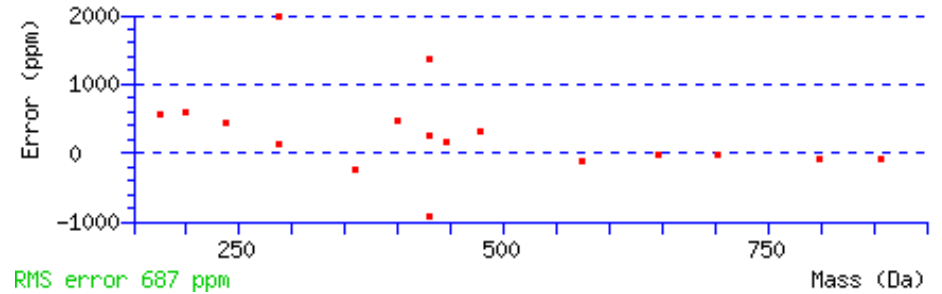

NCBI **BLAST** search of [TPGPGAQSALR](#)

(Parameters: blastp, nr protein database, expect=20000, no filter, PAM30)

Other BLAST [web gateways](#)

**All matches to this query**

| Score | Mr(calc): | Delta  | Sequence                    |
|-------|-----------|--------|-----------------------------|
| 48.8  | 1053.5567 | 0.0001 | <a href="#">TPGPGAQSALR</a> |
| 7.5   | 1053.5567 | 0.0001 | <a href="#">VVGKKGESH</a>   |
| 7.5   | 1053.5567 | 0.0001 | <a href="#">VVGKKGESH</a>   |
| 0.6   | 1053.5567 | 0.0001 | <a href="#">VVGSNISHK</a>   |

Mascot: <http://www.matrixscience.com/>



# Mascot Search Results

## Peptide View

MS/MS Fragmentation of **AAAMDVDTPSGTNSGAGK**

Found in **RBX1\_HUMAN**, P62877|RBX1\_HUMAN RING-box protein 1 - Homo sapiens (Human)

Match to Query 2215: 1706.746648 from(854.380600,2+)

Title: OTMPB070706\_23.984.984.2.dta

Data file D:\data\_LTQOrbitrap\Marie-Pierre Bousquet\OTMPB070706\_23.RAW

Click mouse within plot area to zoom in by factor of two about that point

Or,  to  Da

**Monoisotopic mass of neutral peptide Mr(calc):** 1706.7417

**Variable modifications:**

**N-term** : Acetyl (Protein N-term)

**M4** : Oxidation (M), with neutral losses 0.0000(shown in table), 63.9983

**Ions Score:** 73 **Expect:** 3.5e-006

**Matches (Bold Red):** 41/246 fragment ions using 60 most intense peaks

| # | b | b <sup>++</sup> | b <sup>*</sup> | b <sup>+++</sup> | b <sup>0</sup> | b <sup>0++</sup> | Seq. | y | y <sup>++</sup> | y <sup>*</sup> | y <sup>+++</sup> | y <sup>0</sup> | y <sup>0++</sup> | # |
|---|---|-----------------|----------------|------------------|----------------|------------------|------|---|-----------------|----------------|------------------|----------------|------------------|---|
|   |   |                 |                |                  |                |                  |      |   |                 |                |                  |                |                  |   |

|    |           |          |           |          |           |          |   |           |          |           |          |           |          |  |    |
|----|-----------|----------|-----------|----------|-----------|----------|---|-----------|----------|-----------|----------|-----------|----------|--|----|
| 1  | 114.0549  | 57.5311  |           |          |           |          | A |           |          |           |          |           |          |  | 18 |
| 2  | 185.0921  | 93.0497  |           |          |           |          | A | 1594.7013 | 797.8543 | 1577.6748 | 789.3410 | 1576.6908 | 788.8490 |  | 17 |
| 3  | 256.1292  | 128.5682 |           |          |           |          | A | 1523.6642 | 762.3358 | 1506.6377 | 753.8225 | 1505.6537 | 753.3305 |  | 16 |
| 4  | 403.1646  | 202.0859 |           |          |           |          | M | 1452.6271 | 726.8172 | 1435.6006 | 718.3039 | 1434.6166 | 717.8119 |  | 15 |
| 5  | 518.1915  | 259.5994 |           |          | 500.1810  | 250.5941 | D | 1305.5917 | 653.2995 | 1288.5652 | 644.7862 | 1287.5811 | 644.2942 |  | 14 |
| 6  | 617.2599  | 309.1336 |           |          | 599.2494  | 300.1283 | V | 1190.5648 | 595.7860 | 1173.5382 | 587.2727 | 1172.5542 | 586.7807 |  | 13 |
| 7  | 732.2869  | 366.6471 |           |          | 714.2763  | 357.6418 | D | 1091.4964 | 546.2518 | 1074.4698 | 537.7385 | 1073.4858 | 537.2465 |  | 12 |
| 8  | 833.3346  | 417.1709 |           |          | 815.3240  | 408.1656 | T | 976.4694  | 488.7383 | 959.4429  | 480.2251 | 958.4588  | 479.7331 |  | 11 |
| 9  | 930.3873  | 465.6973 |           |          | 912.3768  | 456.6920 | P | 875.4217  | 438.2145 | 858.3952  | 429.7012 | 857.4112  | 429.2092 |  | 10 |
| 10 | 1017.4194 | 509.2133 |           |          | 999.4088  | 500.2080 | S | 778.3690  | 389.6881 | 761.3424  | 381.1748 | 760.3584  | 380.6828 |  | 9  |
| 11 | 1074.4408 | 537.7240 |           |          | 1056.4303 | 528.7188 | G | 691.3369  | 346.1721 | 674.3104  | 337.6588 | 673.3264  | 337.1668 |  | 8  |
| 12 | 1175.4885 | 588.2479 |           |          | 1157.4779 | 579.2426 | T | 634.3155  | 317.6614 | 617.2889  | 309.1481 | 616.3049  | 308.6561 |  | 7  |
| 13 | 1289.5314 | 645.2693 | 1272.5049 | 636.7561 | 1271.5209 | 636.2641 | N | 533.2678  | 267.1375 | 516.2413  | 258.6243 | 515.2572  | 258.1323 |  | 6  |
| 14 | 1376.5635 | 688.7854 | 1359.5369 | 680.2721 | 1358.5529 | 679.7801 | S | 419.2249  | 210.1161 | 402.1983  | 201.6028 | 401.2143  | 201.1108 |  | 5  |
| 15 | 1433.5849 | 717.2961 | 1416.5584 | 708.7828 | 1415.5743 | 708.2908 | G | 332.1928  | 166.6001 | 315.1663  | 158.0868 |           |          |  | 4  |
| 16 | 1504.6220 | 752.8147 | 1487.5955 | 744.3014 | 1486.6115 | 743.8094 | A | 275.1714  | 138.0893 | 258.1448  | 129.5761 |           |          |  | 3  |
| 17 | 1561.6435 | 781.3254 | 1544.6169 | 772.8121 | 1543.6329 | 772.3201 | G | 204.1343  | 102.5708 | 187.1077  | 94.0575  |           |          |  | 2  |
| 18 |           |          |           |          |           |          | K | 147.1128  | 74.0600  | 130.0863  | 65.5468  |           |          |  | 1  |

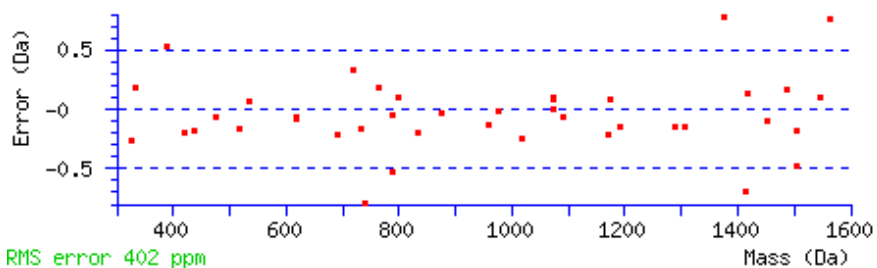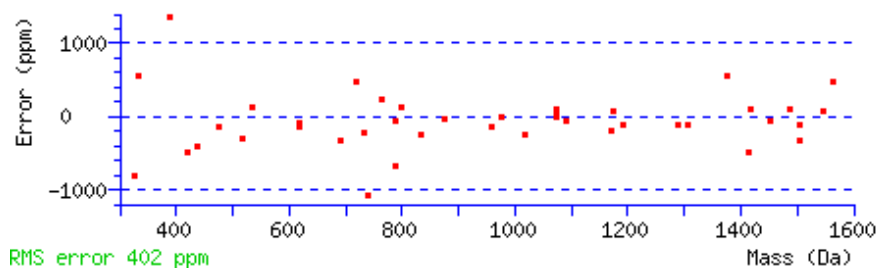

NCBI BLAST search of [AAAMDVDTPSGTNSGAGK](#)

(Parameters: blastp, nr protein database, expect=20000, no filter, PAM30)

Other BLAST [web gateways](#)

### All matches to this query

| Score | Mr(calc): | Delta  | Sequence                           |
|-------|-----------|--------|------------------------------------|
| 72.8  | 1706.7417 | 0.0049 | <a href="#">AAAMDVDTPSGTNSGAGK</a> |

|     |           |         |                                 |
|-----|-----------|---------|---------------------------------|
| 7.4 | 1706.7457 | 0.0009  | <a href="#">TMHSSWEESDELLK</a>  |
| 5.1 | 1706.7530 | -0.0063 | <a href="#">NDECVLEDNSQRTK</a>  |
| 1.5 | 1706.7505 | -0.0038 | <a href="#">CTQEGCGKHFASPSK</a> |
| 0.1 | 1706.7530 | -0.0063 | <a href="#">DSRGAGQEQGMPAGK</a> |

**Mascot:** <http://www.matrixscience.com/>



# **MASCOT** Mascot Search Results

## Peptide View

MS/MS Fragmentation of **EQISDIDDAVR**

Found in **Q59G24\_HUMAN**, Q59G24|Q59G24\_HUMAN Activated RNA polymerase II transcription cofactor

4 variant - Homo sapiens (Human)

Match to Query 1714: 1259.601848 from(630.808200,2+)

Title: OTMPB070706\_25.2144.2144.2.dta

Data file D:\data\_LTQOrbitrap\Marie-Pierre Bousquet\OTMPB070706\_25.RAW

Click mouse within plot area to zoom in by factor of two about that point

Or, to Da

**Monoisotopic mass of neutral peptide Mr(calc):** 1259.5994

**Ions Score:** 63 **Expect:** 2.7e-005

**Matches (Bold Red):** 16/112 fragment ions using 24 most intense peaks

| # | b | b <sup>++</sup> | b <sup>*</sup> | b <sup>+++</sup> | b <sup>0</sup> | b <sup>0++</sup> | Seq. | y | y <sup>++</sup> | y <sup>*</sup> | y <sup>+++</sup> | y <sup>0</sup> | y <sup>0++</sup> | # |
|---|---|-----------------|----------------|------------------|----------------|------------------|------|---|-----------------|----------------|------------------|----------------|------------------|---|
|   |   |                 |                |                  |                |                  |      |   |                 |                |                  |                |                  |   |

|    |                  |          |                 |          |                  |          |   |                  |                 |           |          |           |          |    |
|----|------------------|----------|-----------------|----------|------------------|----------|---|------------------|-----------------|-----------|----------|-----------|----------|----|
| 1  | 130.0499         | 65.5286  |                 |          | 112.0393         | 56.5233  | E |                  |                 |           |          |           |          | 11 |
| 2  | <b>258.1084</b>  | 129.5579 | 241.0819        | 121.0446 | 240.0979         | 120.5526 | Q | 1131.5640        | 566.2857        | 1114.5375 | 557.7724 | 1113.5535 | 557.2804 | 10 |
| 3  | 371.1925         | 186.0999 | 354.1660        | 177.5866 | <b>353.1819</b>  | 177.0946 | I | <b>1003.5055</b> | 502.2564        | 986.4789  | 493.7431 | 985.4949  | 493.2511 | 9  |
| 4  | 458.2245         | 229.6159 | 441.1980        | 221.1026 | <b>440.2140</b>  | 220.6106 | S | <b>890.4214</b>  | 445.7143        | 873.3949  | 437.2011 | 872.4108  | 436.7091 | 8  |
| 5  | 573.2515         | 287.1294 | 556.2249        | 278.6161 | 555.2409         | 278.1241 | D | <b>803.3894</b>  | 402.1983        | 786.3628  | 393.6850 | 785.3788  | 393.1930 | 7  |
| 6  | 686.3355         | 343.6714 | 669.3090        | 335.1581 | 668.3250         | 334.6661 | I | <b>688.3624</b>  | <b>344.6849</b> | 671.3359  | 336.1716 | 670.3519  | 335.6796 | 6  |
| 7  | 801.3625         | 401.1849 | <b>784.3359</b> | 392.6716 | <b>783.3519</b>  | 392.1796 | D | <b>575.2784</b>  | 288.1428        | 558.2518  | 279.6295 | 557.2678  | 279.1375 | 5  |
| 8  | 916.3894         | 458.6984 | 899.3629        | 450.1851 | 898.3789         | 449.6931 | D | <b>460.2514</b>  | 230.6293        | 443.2249  | 222.1161 | 442.2409  | 221.6241 | 4  |
| 9  | 987.4265         | 494.2169 | 970.4000        | 485.7036 | 969.4160         | 485.2116 | A | <b>345.2245</b>  | 173.1159        | 328.1979  | 164.6026 |           |          | 3  |
| 10 | <b>1086.4950</b> | 543.7511 | 1069.4684       | 535.2378 | <b>1068.4844</b> | 534.7458 | V | <b>274.1874</b>  | 137.5973        | 257.1608  | 129.0840 |           |          | 2  |
| 11 |                  |          |                 |          |                  |          | R | 175.1190         | 88.0631         | 158.0924  | 79.5498  |           |          | 1  |

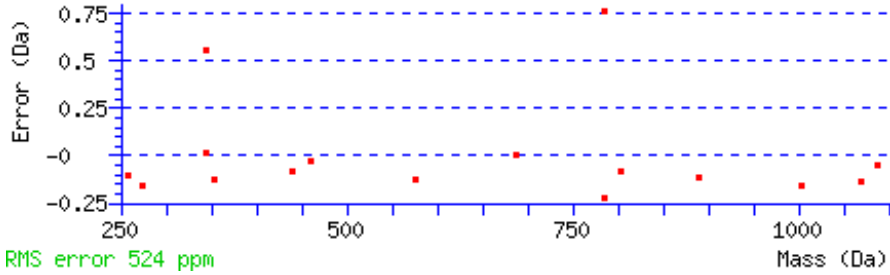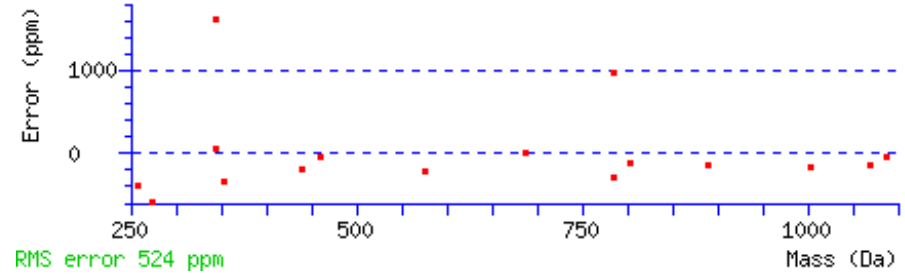

NCBI **BLAST** search of [EQISDIDDAVR](#)

(Parameters: blastp, nr protein database, expect=20000, no filter, PAM30)

Other BLAST [web gateways](#)

**All matches to this query**

| Score | Mr(calc): | Delta   | Sequence                      |
|-------|-----------|---------|-------------------------------|
| 63.0  | 1259.5994 | 0.0025  | <a href="#">EQISDIDDAVR</a>   |
| 4.0   | 1259.6041 | -0.0022 | <a href="#">PTAGSVGGGMGRR</a> |
| 2.2   | 1259.6081 | -0.0062 | <a href="#">LHFCDSNVVR</a>    |
| 1.7   | 1259.6081 | -0.0062 | <a href="#">GMGWKPGEGIGR</a>  |
| 0.5   | 1259.5968 | 0.0050  | <a href="#">ASPSPFCPELR</a>   |
| 0.1   | 1259.5968 | 0.0050  | <a href="#">AVLSACSSYFR</a>   |

**Mascot:** <http://www.matrixscience.com/>

# **MASCOT** Mascot Search Results

## Peptide View

MS/MS Fragmentation of **IEDLSQQAQLAAAEK**

Found in **NACA\_HUMAN**, Q13765|NACA\_HUMAN Nascent polypeptide-associated complex subunit alpha - Homo sapiens (Human)

Match to Query 2249: 1613.826848 from(807.920700,2+)

Title: OTMPB070622\_13.2486.2486.2.dta

Data file D:\data\_LTQOrbitrap\Marie-Pierre Bousquet\OTMPB070622\_13.RAW

Click mouse within plot area to zoom in by factor of two about that point

Or, to Da

**Monoisotopic mass of neutral peptide Mr(calc):** 1613.8260

**Ions Score:** 82 **Expect:** 7.7e-007

**Matches (Bold Red):** 19/154 fragment ions using 36 most intense peaks

| #        | b        | b <sup>++</sup> | b <sup>*</sup> | b <sup>***</sup> | b <sup>0</sup> | b <sup>0++</sup> | Seq.     | y | y <sup>++</sup> | y <sup>*</sup> | y <sup>***</sup> | y <sup>0</sup> | y <sup>0++</sup> | #         |
|----------|----------|-----------------|----------------|------------------|----------------|------------------|----------|---|-----------------|----------------|------------------|----------------|------------------|-----------|
| <b>1</b> | 114.0913 | 57.5493         |                |                  |                |                  | <b>I</b> |   |                 |                |                  |                |                  | <b>15</b> |

|    |           |          |           |          |           |          |   |           |          |           |          |           |          |    |
|----|-----------|----------|-----------|----------|-----------|----------|---|-----------|----------|-----------|----------|-----------|----------|----|
| 2  | 243.1339  | 122.0706 |           |          | 225.1234  | 113.0653 | E | 1501.7493 | 751.3783 | 1484.7227 | 742.8650 | 1483.7387 | 742.3730 | 14 |
| 3  | 358.1609  | 179.5841 |           |          | 340.1503  | 170.5788 | D | 1372.7067 | 686.8570 | 1355.6801 | 678.3437 | 1354.6961 | 677.8517 | 13 |
| 4  | 471.2449  | 236.1261 |           |          | 453.2344  | 227.1208 | L | 1257.6797 | 629.3435 | 1240.6532 | 620.8302 | 1239.6692 | 620.3382 | 12 |
| 5  | 558.2770  | 279.6421 |           |          | 540.2664  | 270.6368 | S | 1144.5957 | 572.8015 | 1127.5691 | 564.2882 | 1126.5851 | 563.7962 | 11 |
| 6  | 686.3355  | 343.6714 | 669.3090  | 335.1581 | 668.3250  | 334.6661 | Q | 1057.5637 | 529.2855 | 1040.5371 | 520.7722 | 1039.5531 | 520.2802 | 10 |
| 7  | 814.3941  | 407.7007 | 797.3676  | 399.1874 | 796.3836  | 398.6954 | Q | 929.5051  | 465.2562 | 912.4785  | 456.7429 | 911.4945  | 456.2509 | 9  |
| 8  | 885.4312  | 443.2193 | 868.4047  | 434.7060 | 867.4207  | 434.2140 | A | 801.4465  | 401.2269 | 784.4199  | 392.7136 | 783.4359  | 392.2216 | 8  |
| 9  | 1013.4898 | 507.2485 | 996.4633  | 498.7353 | 995.4793  | 498.2433 | Q | 730.4094  | 365.7083 | 713.3828  | 357.1951 | 712.3988  | 356.7030 | 7  |
| 10 | 1126.5739 | 563.7906 | 1109.5473 | 555.2773 | 1108.5633 | 554.7853 | L | 602.3508  | 301.6790 | 585.3243  | 293.1658 | 584.3402  | 292.6738 | 6  |
| 11 | 1197.6110 | 599.3091 | 1180.5844 | 590.7959 | 1179.6004 | 590.3039 | A | 489.2667  | 245.1370 | 472.2402  | 236.6237 | 471.2562  | 236.1317 | 5  |
| 12 | 1268.6481 | 634.8277 | 1251.6216 | 626.3144 | 1250.6375 | 625.8224 | A | 418.2296  | 209.6185 | 401.2031  | 201.1052 | 400.2191  | 200.6132 | 4  |
| 13 | 1339.6852 | 670.3462 | 1322.6587 | 661.8330 | 1321.6747 | 661.3410 | A | 347.1925  | 174.0999 | 330.1660  | 165.5866 | 329.1819  | 165.0946 | 3  |
| 14 | 1468.7278 | 734.8675 | 1451.7013 | 726.3543 | 1450.7172 | 725.8623 | E | 276.1554  | 138.5813 | 259.1288  | 130.0681 | 258.1448  | 129.5761 | 2  |
| 15 |           |          |           |          |           |          | K | 147.1128  | 74.0600  | 130.0863  | 65.5468  |           |          | 1  |

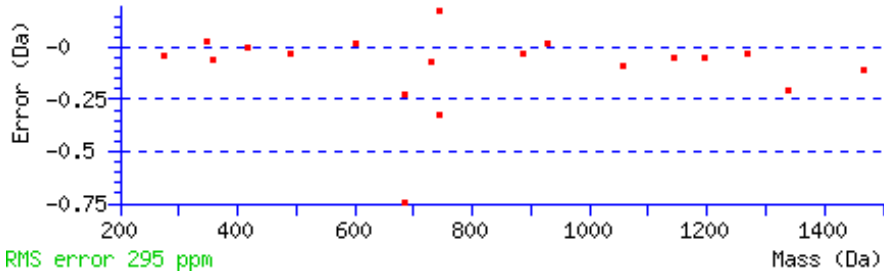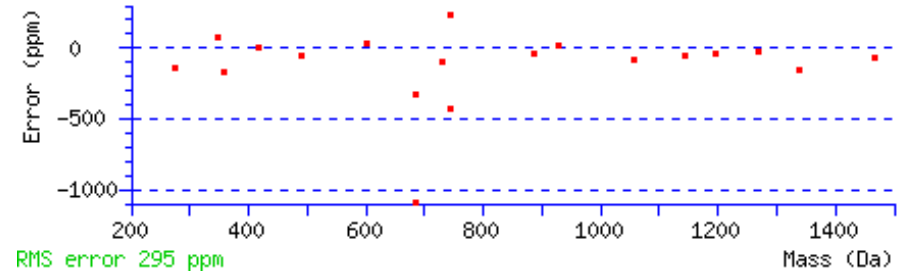

NCBI BLAST search of [IEDLSQQAQLAAAEK](#)

(Parameters: blastp, nr protein database, expect=20000, no filter, PAM30)

Other BLAST [web gateways](#)

All matches to this query

| Score | Mr(calc): | Delta   | Sequence                        |
|-------|-----------|---------|---------------------------------|
| 81.7  | 1613.8260 | 0.0008  | <a href="#">IEDLSQQAQLAAAEK</a> |
| 5.7   | 1613.8334 | -0.0066 | <a href="#">KDLTYSVICKK</a>     |
| 4.5   | 1613.8195 | 0.0073  | <a href="#">MKALEETVRHQEK</a>   |
| 3.9   | 1613.8334 | -0.0066 | <a href="#">LEVKMEIGLPDEK</a>   |

|     |           |         |                                 |
|-----|-----------|---------|---------------------------------|
| 2.4 | 1613.8242 | 0.0026  | <a href="#">HCMASGAVLNKVRR</a>  |
| 2.1 | 1613.8195 | 0.0073  | <a href="#">KNNPQCLLNGSLGEK</a> |
| 2.0 | 1613.8334 | -0.0066 | <a href="#">KDLTYSVICKK</a>     |
| 1.4 | 1613.8260 | 0.0008  | <a href="#">KPASSSSAPQNIPK</a>  |
| 1.3 | 1613.8301 | -0.0032 | <a href="#">YITNKEEFTLQK</a>    |
| 0.9 | 1613.8260 | 0.0008  | <a href="#">SKVEETTEHLVTK</a>   |

**Mascot:** <http://www.matrixscience.com/>
