# Supplementary material
Source: PubMed Central journal article supplement (PMC2689779)
Supplement: M800193-MCP200_3.pdf [file M800193-MCP200_3.pdf]

**Supplementary Data n°4 : Overlap between human PIPs identified by us and the most recent surveys on human PIPs interaction data obtained by TAP strategies followed by systematic MS identification of proteins (1, 2)**

**Common proteins (48 proteins):**

| <b>Our accession #<sup>a</sup></b>        | <b>Accession # (1, 2)</b> | <b>Name</b>                                             |
|-------------------------------------------|---------------------------|---------------------------------------------------------|
| <b>Related to the UPP (47 proteins)</b>   |                           |                                                         |
| P60900                                    | P60900                    | Proteasome subunit alpha type 6 ( $\alpha$ 1)           |
| P25787                                    | P25787                    | Proteasome subunit alpha type 2 ( $\alpha$ 2)           |
| P25789                                    | P25789                    | Proteasome subunit alpha type 4 ( $\alpha$ 3)           |
| O14818                                    | O14818                    | Proteasome subunit alpha type 7 ( $\alpha$ 4)           |
| P28066                                    | P28066                    | Proteasome subunit alpha type 5 ( $\alpha$ 5)           |
| P25786                                    | P25786                    | Proteasome subunit alpha type 1 ( $\alpha$ 6)           |
| P25788                                    | P25788                    | Proteasome subunit alpha type 3 ( $\alpha$ 7)           |
| P28072                                    | P28072                    | Proteasome subunit beta type 6 precursor ( $\beta$ 1)   |
| Q99436                                    | Q99436                    | Proteasome subunit beta type 7 precursor ( $\beta$ 2)   |
| P49720                                    | P49720                    | Proteasome subunit beta type 3 ( $\beta$ 3)             |
| P49721                                    | P49721                    | Proteasome subunit beta type 2 ( $\beta$ 4)             |
| P28074                                    | P28074                    | Proteasome subunit beta type 5 precursor ( $\beta$ 5)   |
| P20618                                    | P20618                    | Proteasome subunit beta type 1 precursor ( $\beta$ 6)   |
| P28070                                    | P28070                    | Proteasome subunit beta type 4 precursor ( $\beta$ 7)   |
| P35998                                    | P35998                    | 26S protease regulatory subunit 7 (Rpt1)                |
| P62191                                    | P62191                    | 26S protease regulatory subunit 4 (Rpt2)                |
| P43686                                    | P43686                    | 26S protease regulatory subunit 6B (Rpt3)               |
| P62333                                    | P62333                    | 26S protease regulatory subunit S10B (Rpt4)             |
| P17980                                    | P17980                    | 26S protease regulatory subunit 6A (Rpt5)               |
| P62195                                    | P62195                    | 26S protease regulatory subunit 8 (Rpt6)                |
| Q13200                                    | Q13200                    | 26S proteasome non-ATPase regulatory subunit 2 (Rpn1)   |
| Q99460                                    | Q99460                    | 26S proteasome non-ATPase regulatory subunit 1 (Rpn2)   |
| O43242                                    | O43242                    | 26S proteasome non-ATPase regulatory subunit 3 (Rpn3)   |
| O00232                                    | O00232                    | 26S proteasome non-ATPase regulatory subunit 12 (Rpn5)  |
| O00231                                    | O00231                    | 26S proteasome non-ATPase regulatory subunit 11 (Rpn6)  |
| Q15008                                    | Q15008                    | 26S proteasome non-ATPase regulatory subunit 6 (Rpn7)   |
| P51665                                    | P51665                    | 26S proteasome non-ATPase regulatory subunit 7 (Rpn8)   |
| Q9UNM6                                    | Q9UNM6                    | 26S proteasome non-ATPase regulatory subunit 13 (Rpn9)  |
| P55036                                    | P55036                    | 26S proteasome non-ATPase regulatory subunit 4 (Rpn10)  |
| O00487                                    | O00487                    | 26S proteasome non-ATPase regulatory subunit 14 (Rpn11) |
| P48556                                    | P48556                    | 26S proteasome non-ATPase regulatory subunit 8 (Rpn12)  |
| Q16186                                    | Q16186                    | Protein ADRM1 (Rpn13)                                   |
| Q9BRP4                                    | Q9BRP4                    | Proteasomal ATPase-associated factor 1 (Rpn14)          |
| Q06323                                    | Q06323                    | Proteasome activator complex subunit 1 (PA28 $\alpha$ ) |
| Q9UL46                                    | Q9UL46                    | Proteasome activator complex subunit 2 (PA28 $\beta$ )  |
| Q14997                                    | Q14997                    | Proteasome activator complex subunit 4 (PA200)          |
| P62988                                    | P62988                    | Ubiquitin                                               |
| P54578                                    | P54578                    | Ubiquitin carboxyl-terminal hydrolase 14                |
| Q9Y5K5                                    | Q5LJA5                    | Ubiquitin carboxyl-terminal hydrolase isozyme L5        |
| Q15386                                    | Q15386                    | Ubiquitin-protein ligase E3C                            |
| P54727                                    | P54727                    | UV excision repair protein RAD23 homolog B              |
| P68104                                    | P68104                    | Translation elongation factor 1 alpha 1                 |
| P08107                                    | P08107                    | Heat shock 70 kDa protein 1                             |
| P11142                                    | P11142                    | Heat shock cognate 71 kDa protein                       |
| P08238                                    | P08238                    | Heat shock protein HSP 90-beta                          |
| P49368                                    | P49368                    | T-complex protein 1 subunit gamma                       |
| Q99832                                    | Q53HV2                    | T-complex protein 1 subunit eta                         |
| <b>Not related to the UPP (1 protein)</b> |                           |                                                         |
| P62258                                    | P62258                    | 14-3-3 protein epsilon                                  |

<sup>a</sup> : for more clarity, the reported member of the protein group is the one that we considered as the most significant according to the functional description given in the UniProt Knowledgebase.

**Other studies (1, 2): (44 specific proteins) :**

| Accession # (1, 2)                          | Name                                                                                            |
|---------------------------------------------|-------------------------------------------------------------------------------------------------|
| <b>Related to the UPP (6 proteins)</b>      |                                                                                                 |
| P60896                                      | 26S proteasome complex subunit DSS1                                                             |
| O75832                                      | 26S proteasome non-ATPase regulatory subunit 10 (Gankyrin)                                      |
| P61289                                      | Proteasome activator complex subunit 3 (PA28 $\gamma$ )                                         |
| Q05086                                      | Ubiquitin-protein ligase E3A                                                                    |
| Q9UMX0                                      | Ubiquilin-1                                                                                     |
| Q5D027                                      | UBQLN2 protein (Ubiquilin 2)                                                                    |
| <b>Not related to the UPP (38 proteins)</b> |                                                                                                 |
| P16403                                      | Histone H1.2 (Histone H1d)                                                                      |
| Q5JQ12                                      | Adaptor-related protein complex 3, mu 1 subunit                                                 |
| O00203                                      | AP-3 complex subunit beta-1                                                                     |
| O14617                                      | AP-3 complex subunit delta-1                                                                    |
| Q53XL4                                      | Adaptor-related protein complex 3, sigma 1 subunit                                              |
| O95831                                      | Programmed cell death protein 8, mitochondrial precursor                                        |
| P50991                                      | T-complex protein 1 subunit delta (TCP-1-delta)                                                 |
| P78371                                      | T-complex protein 1 subunit beta (TCP-1-beta)                                                   |
| P48643                                      | T-complex protein 1 subunit epsilon (TCP-1-epsilon)                                             |
| P50990                                      | T-complex protein 1 subunit theta (TCP-1-theta)                                                 |
| P17987                                      | T-complex protein 1 subunit alpha (TCP-1-alpha)                                                 |
| P40227                                      | T-complex protein 1 subunit zeta (TCP-1-zeta)                                                   |
| Q15293                                      | Reticulocalbin-1 precursor                                                                      |
| P34931                                      | Heat shock 70 kDa protein 1L (Heat shock 70 kDa protein 1-like)                                 |
| O43852                                      | Calumenin precursor (Crocabin) (IEF SSP 9302)                                                   |
| P07900                                      | Heat shock protein HSP 90-alpha (HSP 86) (NY-REN-38 antigen)                                    |
| P10809                                      | 60 kDa heat shock protein, mitochondrial precursor (Hsp60)                                      |
| P07437                                      | Tubulin beta-2 chain                                                                            |
| P68363                                      | Tubulin alpha-ubiquitous chain (Alpha-tubulin ubiquitous)                                       |
| P49411                                      | Elongation factor Tu, mitochondrial precursor (EF-Tu) (P43)                                     |
| Q71U36                                      | Tubulin alpha-3 chain (Alpha-tubulin 3) (Tubulin B-alpha-1)                                     |
| P05388                                      | 60S acidic ribosomal protein P0 (L10E)                                                          |
| Q00839                                      | Heterogeneous nuclear ribonucleoprotein U (hnRNP U)                                             |
| P54652                                      | Heat shock-related 70 kDa protein 2                                                             |
| P05141                                      | ADP/ATP translocase 2 (Adenine nucleotide translocator 2) (ANT 2)                               |
| Q13263                                      | Transcription intermediary factor 1-beta (TIF1-beta)                                            |
| P20700                                      | Lamin-B1                                                                                        |
| Q96IS6                                      | HSPA8 protein (Fragment)                                                                        |
| P63104                                      | 14-3-3 protein zeta/delta (Protein kinase C inhibitor protein 1)                                |
| P12236                                      | ADP/ATP translocase 3 (Adenine nucleotide translocator 2) (ANT 3)                               |
| Q8WVY7                                      | Ubiquitin-like domain-containing CTD phosphatase 1                                              |
| Q14257                                      | Reticulocalbin-2 precursor (Calcium-binding protein ERC-55) (E6-binding protein) (E6BP)         |
| Q9GZP4                                      | AD039 (Novel protein) (HT014) (Thioredoxin family Trp26)                                        |
| O14654                                      | Insulin receptor substrate 4                                                                    |
| P31689                                      | DnaJ homolog subfamily A member 1 (Heat shock 40 kDa protein 4)                                 |
| Q02978                                      | Mitochondrial 2-oxoglutarate/malate carrier protein (OGCP) (Solute carrier family 25 member 11) |
| Q53HK5                                      | TATA binding protein interacting protein 49 kDa variant                                         |
| Q12905                                      | Interleukin enhancer-binding factor 2                                                           |

1. Wang, X. and Huang, L. (2008) Identifying dynamic interactors of protein complexes by quantitative mass spectrometry. *Mol Cell Proteomics* 7, 46-57
2. Wang, X., Chen, C. F., Baker, P. R., Chen, P. L., Kaiser, P. and Huang, L. (2007) Mass spectrometric characterization of the affinity-purified human 26S proteasome complex. *Biochemistry* 46, 3553-65
