# Supplementary material
Source: PubMed Central journal article supplement (PMC2689779)
Supplement: M800193-MCP200_4.pdf [file M800193-MCP200_4.pdf]

## Post-translationally modified peptides

| Hit                | Accession - ID                      | Description                      | Score | MW      | PI |
|--------------------|-------------------------------------|----------------------------------|-------|---------|----|
| <a href="#">50</a> | <a href="#">P62988 - UBIQ_HUMAN</a> | Ubiquitin - Homo sapiens (Human) | 95.24 | 8559.62 |    |

[Q5RKT7 \(protein identified with the same set of peptides\)](#)

| Query                | m/z      | Charge | Exp. mass   | Theo. mass  | Delta     | Miss. clv. | Score | pValue                    | Rank | Sequence                        | Position |
|----------------------|----------|--------|-------------|-------------|-----------|------------|-------|---------------------------|------|---------------------------------|----------|
| <a href="#">2391</a> | 730.8967 | 2      | 1459.778848 | 1459.778305 | 0.000543  | 1          | 70    | 1.014926088<br>63851e-005 | 1    | LIFAGKQLEDGR + GlyGly (K)       | 43-54    |
| <a href="#">3120</a> | 865.4885 | 2      | 1728.962448 | 1728.963486 | -0.001038 | 1          | 33    | 0.040063779<br>8197438    | 1    | LIFAGKQLEDGR + LeuArgGlyGly (K) | 43-54    |

# **MASCOT** Mascot Search Results

## Peptide View

MS/MS Fragmentation of **LIFAGKQLEDGR**

Found in **UBIQ\_HUMAN**, P62988|UBIQ\_HUMAN Ubiquitin - Homo sapiens (Human)

Match to Query 2391: 1459.778848 from(730.896700,2+)

Title: OTMPB070622\_08.2670.2670.2.dta

Data file D:\data\_LTQOrbitrap\Marie-Pierre Bousquet\OTMPB070622\_08.RAW

Click mouse within plot area to zoom in by factor of two about that point

Or,  to  Da

**Monoisotopic mass of neutral peptide Mr(calc):** 1459.7783

**Variable modifications:**

**K6** : GlyGly (K)

**Ions Score:** 71 **Expect:** 1e-005

**Matches (Bold Red):** 21/102 fragment ions using 40 most intense peaks

| # | b | b++ | b* | b*** | b <sup>0</sup> | b <sup>0++</sup> | Seq. | y | y++ | y* | y*** | y <sup>0</sup> | y <sup>0++</sup> | # |
|---|---|-----|----|------|----------------|------------------|------|---|-----|----|------|----------------|------------------|---|
|---|---|-----|----|------|----------------|------------------|------|---|-----|----|------|----------------|------------------|---|

|    |           |          |           |          |           |          |   |           |          |           |          |           |          |  |    |
|----|-----------|----------|-----------|----------|-----------|----------|---|-----------|----------|-----------|----------|-----------|----------|--|----|
| 1  | 114.0913  | 57.5493  |           |          |           |          | L |           |          |           |          |           |          |  | 12 |
| 2  | 227.1754  | 114.0913 |           |          |           |          | I | 1347.7015 | 674.3544 | 1330.6750 | 665.8411 | 1329.6910 | 665.3491 |  | 11 |
| 3  | 374.2438  | 187.6255 |           |          |           |          | F | 1234.6175 | 617.8124 | 1217.5909 | 609.2991 | 1216.6069 | 608.8071 |  | 10 |
| 4  | 445.2809  | 223.1441 |           |          |           |          | A | 1087.5491 | 544.2782 | 1070.5225 | 535.7649 | 1069.5385 | 535.2729 |  | 9  |
| 5  | 502.3024  | 251.6548 |           |          |           |          | G | 1016.5119 | 508.7596 | 999.4854  | 500.2463 | 998.5014  | 499.7543 |  | 8  |
| 6  | 744.4403  | 372.7238 | 727.4137  | 364.2105 |           |          | K | 959.4905  | 480.2489 | 942.4639  | 471.7356 | 941.4799  | 471.2436 |  | 7  |
| 7  | 872.4989  | 436.7531 | 855.4723  | 428.2398 |           |          | Q | 717.3526  | 359.1799 | 700.3260  | 350.6667 | 699.3420  | 350.1747 |  | 6  |
| 8  | 985.5829  | 493.2951 | 968.5564  | 484.7818 |           |          | L | 589.2940  | 295.1506 | 572.2675  | 286.6374 | 571.2835  | 286.1454 |  | 5  |
| 9  | 1114.6255 | 557.8164 | 1097.5990 | 549.3031 | 1096.6150 | 548.8111 | E | 476.2100  | 238.6086 | 459.1834  | 230.0953 | 458.1994  | 229.6033 |  | 4  |
| 10 | 1229.6525 | 615.3299 | 1212.6259 | 606.8166 | 1211.6419 | 606.3246 | D | 347.1674  | 174.0873 | 330.1408  | 165.5740 | 329.1568  | 165.0820 |  | 3  |
| 11 | 1286.6739 | 643.8406 | 1269.6474 | 635.3273 | 1268.6634 | 634.8353 | G | 232.1404  | 116.5738 | 215.1139  | 108.0606 |           |          |  | 2  |
| 12 |           |          |           |          |           |          | R | 175.1190  | 88.0631  | 158.0924  | 79.5498  |           |          |  | 1  |

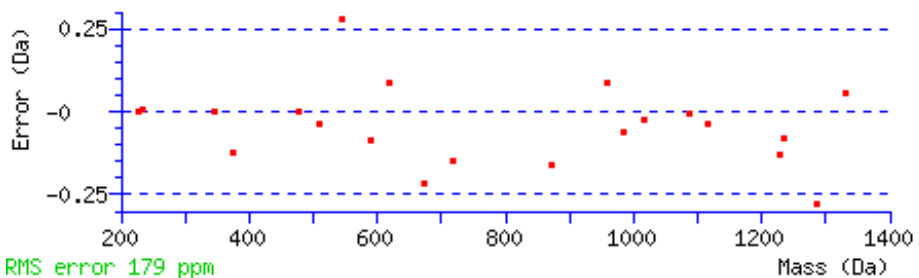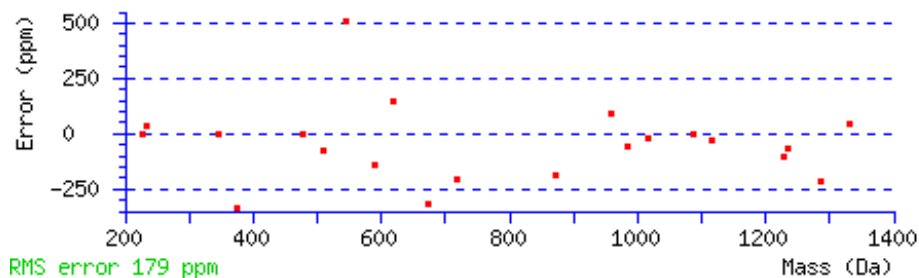

NCBI **BLAST** search of [LIFAGKQLEDGR](#)

(Parameters: blastp, nr protein database, expect=20000, no filter, PAM30)

Other BLAST [web gateways](#)

### All matches to this query

| Score | Mr(calc): | Delta   | Sequence                      |
|-------|-----------|---------|-------------------------------|
| 70.8  | 1459.7783 | 0.0005  | <a href="#">LIFAGKQLEDGR</a>  |
| 7.9   | 1459.7816 | -0.0028 | <a href="#">QAKVRMIAAEAEK</a> |
| 6.8   | 1459.7857 | -0.0069 | <a href="#">LIFCSGLVLHR</a>   |
| 6.3   | 1459.7718 | 0.0071  | <a href="#">ILCDRRPPYTAR</a>  |
| 4.4   | 1459.7816 | -0.0028 | <a href="#">MAALASSLIRQK</a>  |
| 3.3   | 1459.7816 | -0.0028 | <a href="#">MLLLAREDKK</a>    |

|     |           |         |                              |
|-----|-----------|---------|------------------------------|
| 3.3 | 1459.7817 | -0.0028 | <a href="#">TARLECVVSGIK</a> |
| 3.3 | 1459.7816 | -0.0028 | <a href="#">IKDISRECALK</a>  |
| 2.5 | 1459.7817 | -0.0028 | <a href="#">MLKEVLQREGK</a>  |
| 1.0 | 1459.7783 | 0.0006  | <a href="#">AFKESSALTKHK</a> |

Mascot: <http://www.matrixscience.com/>

# Mascot Search Results

## Peptide View

MS/MS Fragmentation of **LIFAGKQLEDGR**

Found in **Q5RKT7\_HUMAN**, Q5RKT7|Q5RKT7\_HUMAN Ribosomal protein S27a - Homo sapiens (Human)

Match to Query 3120: 1728.962448 from(865.488500,2+)

Title: OTMPB070622\_02.2414.2414.2.dta

Data file D:\data\_LTQOrbitrap\Marie-Pierre Bousquet\OTMPB070622\_02.RAW

Click mouse within plot area to zoom in by factor of two about that point

Or,  to  Da

**Monoisotopic mass of neutral peptide Mr(calc):** 1728.9635

**Variable modifications:**

**K6** : LeuArgGlyGly (K)

**Ions Score:** 33 **Expect:** 0.04

**Matches (Bold Red):** 18/102 fragment ions using 78 most intense peaks

| #                  | b                | b <sup>++</sup> | b <sup>*</sup>   | b <sup>*++</sup> | b <sup>0</sup> | b <sup>0++</sup> | Seq.     | y               | y <sup>++</sup> | y <sup>*</sup>   | y <sup>*++</sup> | y <sup>0</sup>   | y <sup>0++</sup> | #                  |
|--------------------|------------------|-----------------|------------------|------------------|----------------|------------------|----------|-----------------|-----------------|------------------|------------------|------------------|------------------|--------------------|
| <a href="#">1</a>  | 114.0913         | 57.5493         |                  |                  |                |                  | <b>L</b> |                 |                 |                  |                  |                  |                  | <a href="#">12</a> |
| <a href="#">2</a>  | 227.1754         | 114.0913        |                  |                  |                |                  | <b>I</b> | 1616.8867       | 808.9470        | 1599.8602        | <b>800.4337</b>  | <b>1598.8762</b> | 799.9417         | <a href="#">11</a> |
| <a href="#">3</a>  | <b>374.2438</b>  | 187.6255        |                  |                  |                |                  | <b>F</b> | 1503.8027       | 752.4050        | 1486.7761        | 743.8917         | 1485.7921        | 743.3997         | <a href="#">10</a> |
| <a href="#">4</a>  | <b>445.2809</b>  | 223.1441        |                  |                  |                |                  | <b>A</b> | 1356.7342       | 678.8708        | <b>1339.7077</b> | 670.3575         | 1338.7237        | 669.8655         | <a href="#">9</a>  |
| <a href="#">5</a>  | 502.3024         | 251.6548        |                  |                  |                |                  | <b>G</b> | 1285.6971       | <b>643.3522</b> | <b>1268.6706</b> | 634.8389         | 1267.6866        | 634.3469         | <a href="#">8</a>  |
| <a href="#">6</a>  | <b>1013.6255</b> | 507.3164        | 996.5989         | 498.8031         |                |                  | <b>K</b> | 1228.6757       | 614.8415        | 1211.6491        | 606.3282         | 1210.6651        | 605.8362         | <a href="#">7</a>  |
| <a href="#">7</a>  | <b>1141.6840</b> | 571.3457        | 1124.6575        | 562.8324         |                |                  | <b>Q</b> | 717.3526        | 359.1799        | 700.3260         | 350.6667         | 699.3420         | 350.1747         | <a href="#">6</a>  |
| <a href="#">8</a>  | <b>1254.7681</b> | 627.8877        | 1237.7416        | 619.3744         |                |                  | <b>L</b> | <b>589.2940</b> | 295.1506        | 572.2675         | 286.6374         | 571.2835         | 286.1454         | <a href="#">5</a>  |
| <a href="#">9</a>  | <b>1383.8107</b> | 692.4090        | 1366.7841        | 683.8957         | 1365.8001      | 683.4037         | <b>E</b> | <b>476.2100</b> | 238.6086        | 459.1834         | 230.0953         | 458.1994         | 229.6033         | <a href="#">4</a>  |
| <a href="#">10</a> | <b>1498.8376</b> | 749.9225        | <b>1481.8111</b> | 741.4092         | 1480.8271      | 740.9172         | <b>D</b> | <b>347.1674</b> | 174.0873        | 330.1408         | 165.5740         | <b>329.1568</b>  | 165.0820         | <a href="#">3</a>  |
| <a href="#">11</a> | <b>1555.8591</b> | 778.4332        | 1538.8326        | 769.9199         | 1537.8485      | 769.4279         | <b>G</b> | 232.1404        | 116.5738        | 215.1139         | 108.0606         |                  |                  | <a href="#">2</a>  |
| <a href="#">12</a> |                  |                 |                  |                  |                |                  | <b>R</b> | 175.1190        | 88.0631         | 158.0924         | 79.5498          |                  |                  | <a href="#">1</a>  |

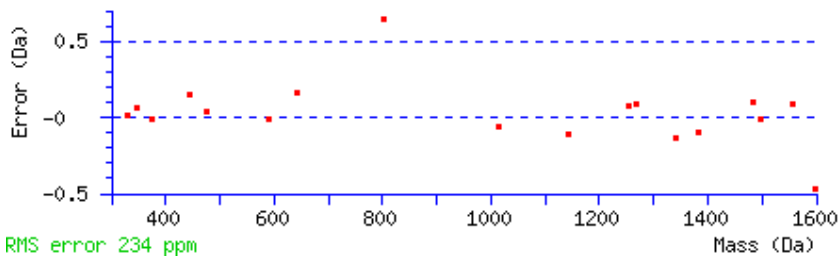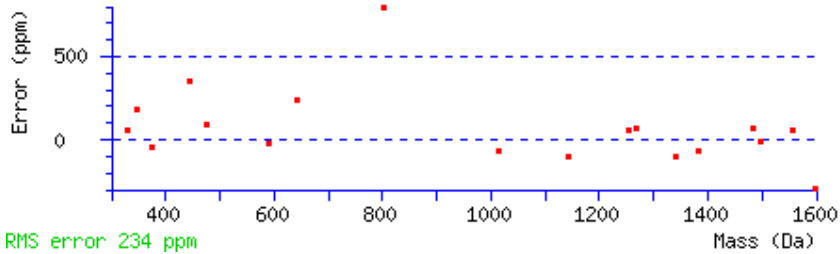

NCBI **BLAST** search of [LIFAGKQLEDGR](#)

(Parameters: blastp, nr protein database, expect=20000, no filter, PAM30)

Other BLAST [web gateways](#)

**All matches to this query**

| Score | Mr(calc): | Delta   | Sequence                       |
|-------|-----------|---------|--------------------------------|
| 33.4  | 1728.9635 | -0.0010 | <a href="#">LIFAGKQLEDGR</a>   |
| 0.6   | 1728.9635 | -0.0011 | <a href="#">QLSKPVTTFVDGR</a>  |
| 0.5   | 1728.9675 | -0.0051 | <a href="#">WLLVSKNSVLPFGR</a> |

Mascot: <http://www.matrixscience.com/>
